# Supplementary material for: Magnetism of transition-metal-doped tetrel nanoclusters: multi-reference character and spin–orbit effects in Sn12TM (TM = Cr, Mn, Fe)
Source: Royal Society of Chemistry journal article supplement (doi:10.1039/d4nr03920c), 2025-01-01
Supplement: d4nr03920c4.pdf [file d4nr03920c4.pdf]

## Electronic Supporting Information

### Magnetism of transition-metal doped tetrel nanoclusters: Multi-reference character and spin-orbit effects

Jannik Mehmel,\* Carlos M. Jimenez-Muñoz, Filip Rivic, Vera Krewald, and Rolf Schäfer

Technical University of Darmstadt, Eduard-Zintl-Institute, Peter-Grünberg-Straße 8, 64287 Darmstadt, Germany.

## 1 Electric Deflection Experiments

In Fig. S1 the electric deflection profiles are shown for the  $\text{Sn}_{12}\text{TM}$  clusters with  $\text{TM} = \text{Mn}, \text{Cr}, \text{Fe}$  at a nozzle temperature of  $T_{\text{nozzle}} = 16 \text{ K}$  and a deflection voltage of  $U = 24 \text{ kV}$ . In short, the deflection of the clusters depends on the electronic polarizability and the permanent electric dipole moment, the latter being the structure-sensitive property. For rigid clusters, the presence of a permanent dipole moment leads to a broadening of the molecular beam. In contrast, the polarizability causes a single-sided shift of the molecular beam.

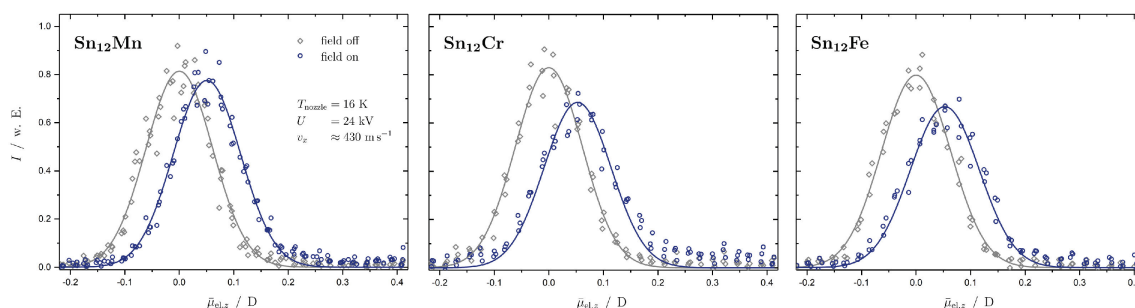

**Figure S1.** Electric deflection profiles of  $\text{Sn}_{12}\text{TM}$  with  $\text{TM} = \text{Mn}, \text{Cr}, \text{Fe}$  (from left to right) at  $T_{\text{nozzle}} = 16 \text{ K}$  and a deflection voltage of  $U = 24 \text{ kV}$ . The intensity  $I$  is given as a function of the projection of the observed electric dipole moment on the field direction averaged over the length of the deflection unit  $\bar{\mu}_{\text{el},z}$ . The grey squares represent the cluster intensity without applied field whereas blue open circles represent the intensity with applied electric field. Gaussian functions are fitted to the experimental data without (grey solid line) and with applied electric field (blue solid line). The width of the latter is equal to the fit function of the experimental data without field, since no beam broadening is observed for the majority of points.

It can be seen that the intensity in the beam center is depicted very well by the Gaussian fit function. However, a small tailing in the direction of the field gradient can be seen which is not described by the Gaussian. As was demonstrated in a previous study on  $\text{Sn}_{12}\text{X}$  clusters with  $\text{X} = \text{Al}, \text{Ga}$  and  $\text{In}$ , the deflection profiles can be explained by the presence of two fractions of clusters, i.e. one being nonpolar suggesting an inversion center to be present in the structure and one being polar and less symmetric. Since the polar fraction is very small compared to the nonpolar fraction, we are only focussed on this nonpolar isomer which is a spherical rotor.

\*Corresponding author: jannik.mehmel@wihi.tu-darmstadt.de

## 2 Temperature-dependent Magnetic Deflection Experiments

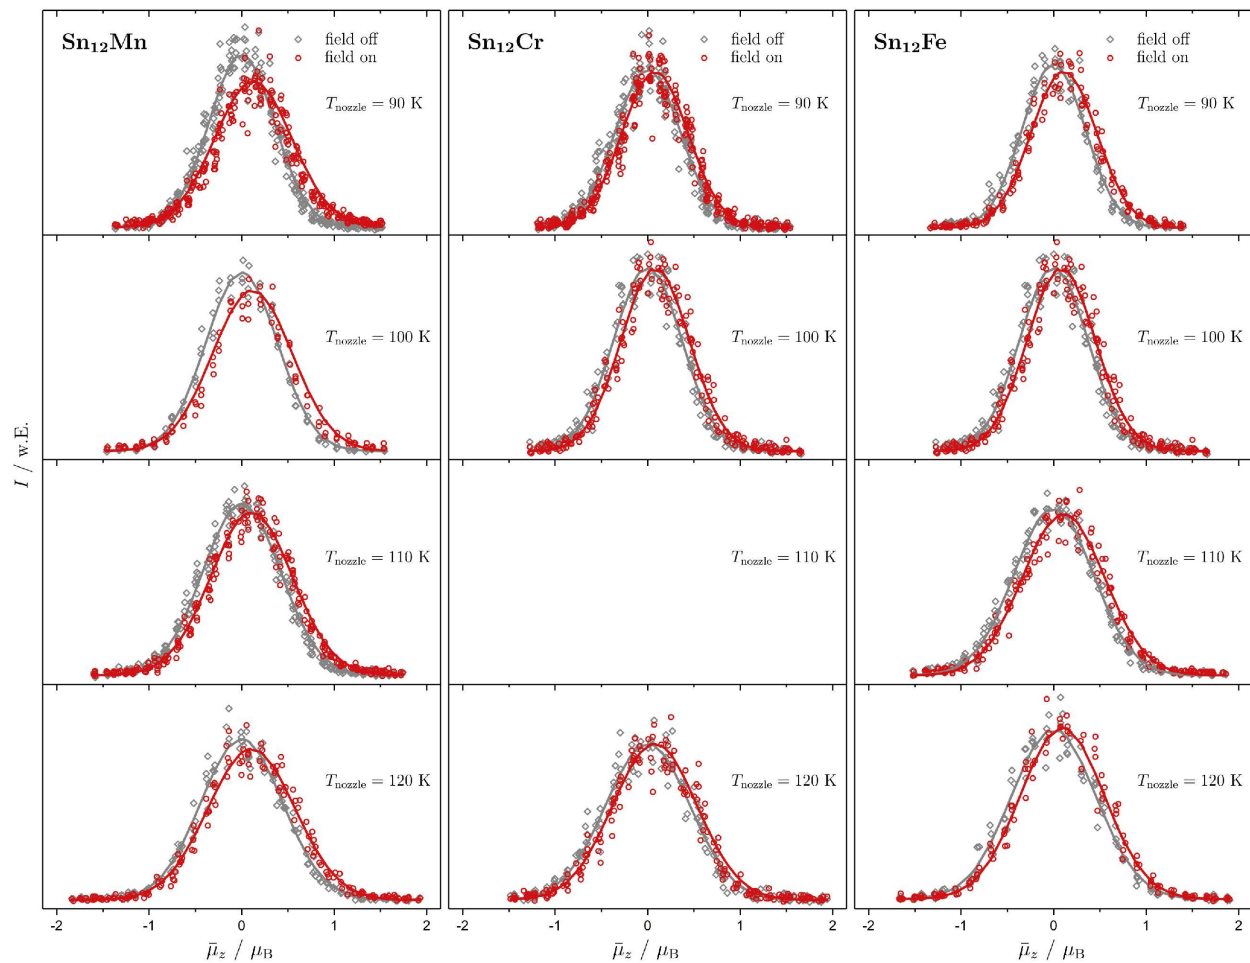

**Figure S2.** Magnetic deflection profiles of  $\text{Sn}_{12}\text{TM}$  with TM = Mn, Cr and Fe (left to right) at  $T_{\text{nozzle}} = 90 - 120$  K without (grey) and with (red) applied magnetic field. Gaussian functions are fitted to the experimental data. From the single-sided shift of this fit function, the  $g$ -factor and the Spin multiplicity  $S$  is determined in the main text with Curie's law. No deflection experiment was carried out for  $\text{Sn}_{12}\text{Cr}$  at  $T_{\text{nozzle}} = 110$  K. Please note that beam profiles get wider with increased temperature, since the beam width depends on the cluster velocity which increases with increasing  $T_{\text{nozzle}}$ .

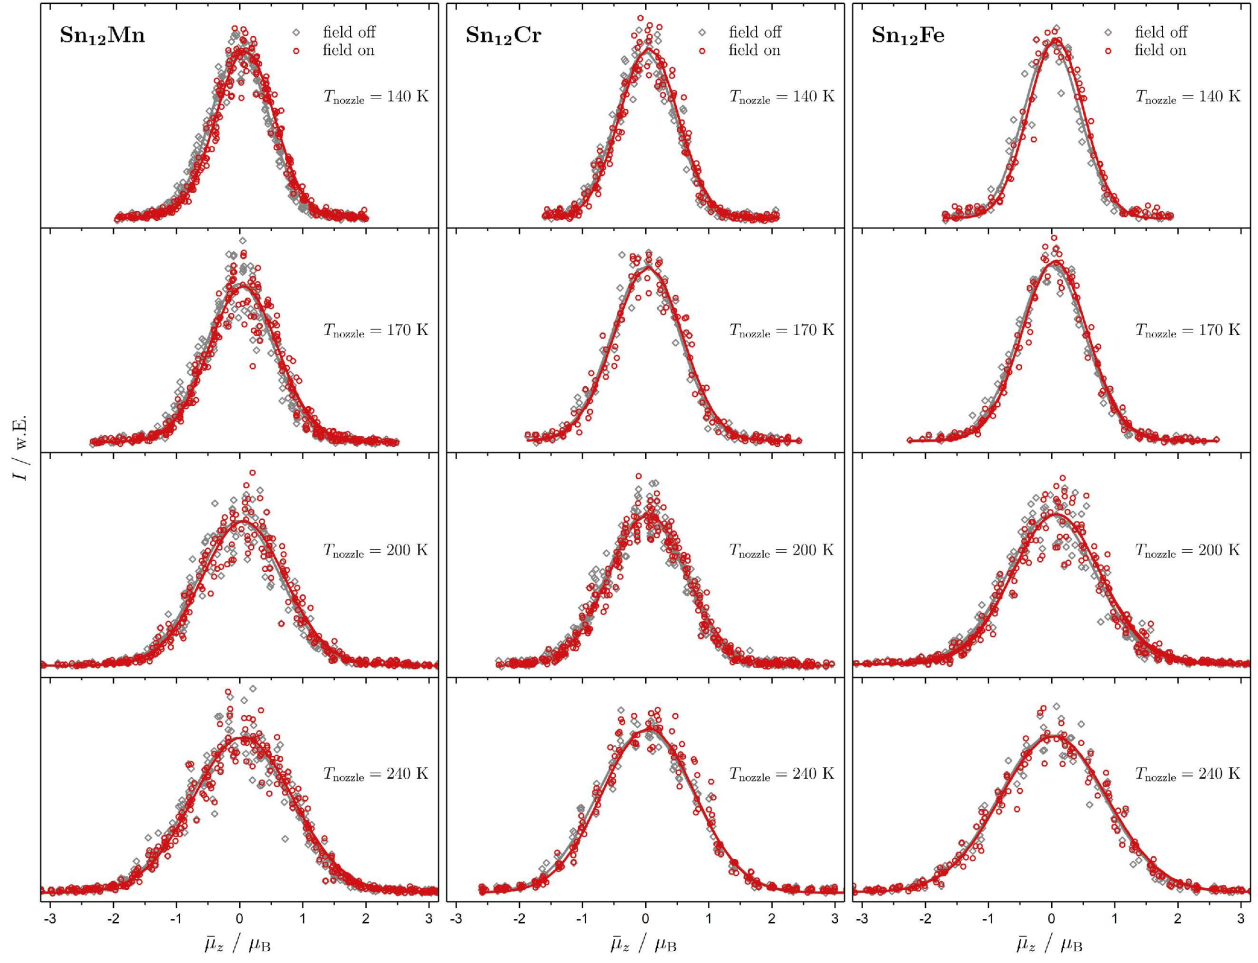

**Figure S3.** Magnetic deflection profiles of  $\text{Sn}_{12}\text{TM}$  with TM = Mn, Cr and Fe (left to right) at  $T_{\text{nozzle}} = 140 - 240$  K without (grey) and with (red) applied magnetic field. Gaussian functions are fitted to the experimental data. From the single-sided shift of this fit function, the  $g$ -factor and the Spin multiplicity  $S$  is determined in the main text with Curie's law. Please note that beam profiles get wider with increased temperature, since the beam width depends on the cluster velocity which increases with increasing  $T_{\text{nozzle}}$ .

### 3 CASSCF Results for the $g$ -factor

**Table S1.** Results for the  $g$ -factor of  $\text{Sn}_{12}\text{Cr}$ ,  $\text{Sn}_{12}\text{Mn}$  and  $\text{Sn}_{12}\text{Fe}$ . The table shows the three components of the  $g$ -factor, its isotropic value and the number of excited states considered for the calculation (roots). If no CAS size is given in parentheses, the values given are the result of calculations with an active space of 14 orbitals. The default basis set is (SARC)-DKH-TZVP.

|                                             | $g_1$ | $g_2$ | $g_3$ | $g_{\text{iso}}$ | Roots    |
|---------------------------------------------|-------|-------|-------|------------------|----------|
| $\text{CrSn}_{12}$ (14,10)                  | 0.53  | 1.15  | 1.37  | 1.00             | 15       |
| $\text{CrSn}_{12}$                          | 1.92  | 1.93  | 2.00  | 1.95             | 5        |
| $\text{CrSn}_{12}$                          | 1.69  | 1.72  | 1.78  | 1.73             | 25       |
| $\text{CrSn}_{12}$                          | 1.70  | 1.72  | 1.81  | 1.74             | 45       |
| $\text{CrSn}_{12}$                          | 1.81  | 1.82  | 1.83  | 1.82             | 60       |
| $\text{CrSn}_{12}$                          | 1.87  | 1.88  | 1.88  | 1.88             | 80       |
| $\text{MnSn}_{12}$ ( $\text{I}_h$ ) (15,10) | 2.01  | 2.04  | 2.04  | 2.03             | 15       |
| $\text{MnSn}_{12}$ ( $\text{I}_h$ )         | 1.77  | 1.86  | 1.91  | 1.85             | 30       |
| $\text{MnSn}_{12}$ ( $\text{I}_h$ )         | 1.75  | 1.75  | 1.75  | 1.75             | 40       |
| $\text{MnSn}_{12}$ ( $\text{I}_h$ )         | 1.84  | 1.87  | 1.92  | 1.88             | 50       |
| $\text{MnSn}_{12}$ ( $\text{I}_h$ )         | 1.93  | 1.93  | 1.93  | 1.93             | 60       |
| $\text{MnSn}_{12}$ ( $\text{T}_h$ )         | 1.89  | 1.89  | 1.89  | 1.89             | 60       |
| $\text{MnSn}_{12}$ ( $\text{D}_{5d}$ )      | 1.91  | 1.92  | 1.92  | 1.92             | 60       |
| $\text{MnSn}_{12}$ ( $\text{D}_{3d}$ )      | 1.94  | 1.94  | 1.95  | 1.94             | 60       |
| $\text{MnSn}_{12}$ ( $\text{D}_{2h}$ )      | 1.91  | 1.91  | 1.92  | 1.92             | 60       |
| $\text{FeSn}_{12}$ (16,10)                  | 2.11  | 2.21  | 2.69  | 2.34             | 15       |
| $\text{FeSn}_{12}$ (16,10) QZVPP - Fe       | 2.12  | 2.23  | 2.69  | 2.34             | 15       |
| $\text{FeSn}_{12}$ (16,10)                  | 2.25  | 2.35  | 2.69  | 2.43             | 30       |
| $\text{FeSn}_{12}$ (16,10) QZVPP - Fe       | 2.24  | 2.37  | 2.68  | 2.43             | 30       |
| $\text{FeSn}_{12}$                          | 2.00  | 2.38  | 2.66  | 2.35             | 5        |
| $\text{FeSn}_{12}$                          | 2.15  | 2.46  | 2.71  | 2.44             | 30       |
| $\text{FeSn}_{12}$ state-averaged           | 2.26  | 2.32  | 2.72  | 2.43             | 30,15,15 |
| $\text{FeSn}_{12}$                          | 2.19  | 2.47  | 2.68  | 2.45             | 45       |
| $\text{FeSn}_{12}$                          | 2.06  | 2.43  | 2.45  | 2.31             | 60       |

## 4 CASSCF Orbitals and Corresponding Excited States

In the following section the CASSCF orbitals from the active spaces mentioned in the main text are displayed. The orbitals are grouped as described in the main text and labeled according to the configurations shown in the following tables. For an example, the groundstate configuration of  $\text{Sn}_{12}\text{Mn}$  is 22222 11111 0000. This means that the orbitals 1 to 5 are doubly occupied, the orbitals 6 to 10 are singly occupied and the orbitals 11 to 14 are unoccupied in this configuration. This is the same for  $\text{Sn}_{12}\text{Cr}$  and  $\text{Sn}_{12}\text{Fe}$ . The tables show the most dominant configuration of the respective excited state sorted by their CASSCF energy. For  $\text{Sn}_{12}\text{Fe}$  and  $\text{Sn}_{12}\text{Cr}$  the low energy excited states are presented with the second most dominant configuration to emphasize their difference.

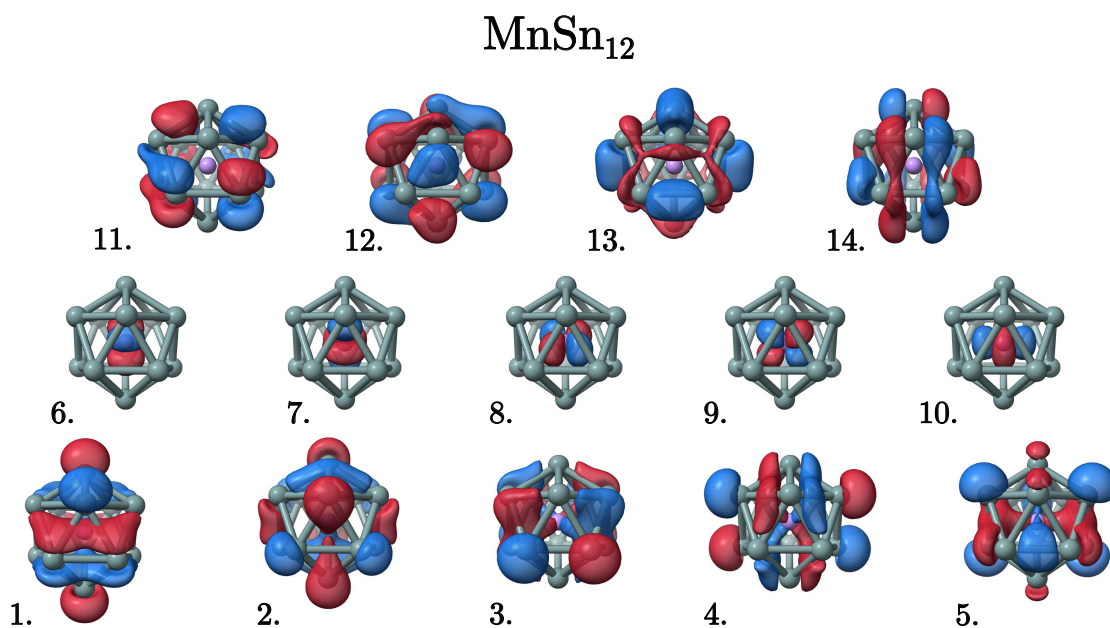

**Figure S4.** Active orbitals of  $\text{Sn}_{12}\text{Mn}$  in the CAS(15,14) calculation. The orbitals are in the order of the configurations shown in the tables below and grouped as described in the main text.

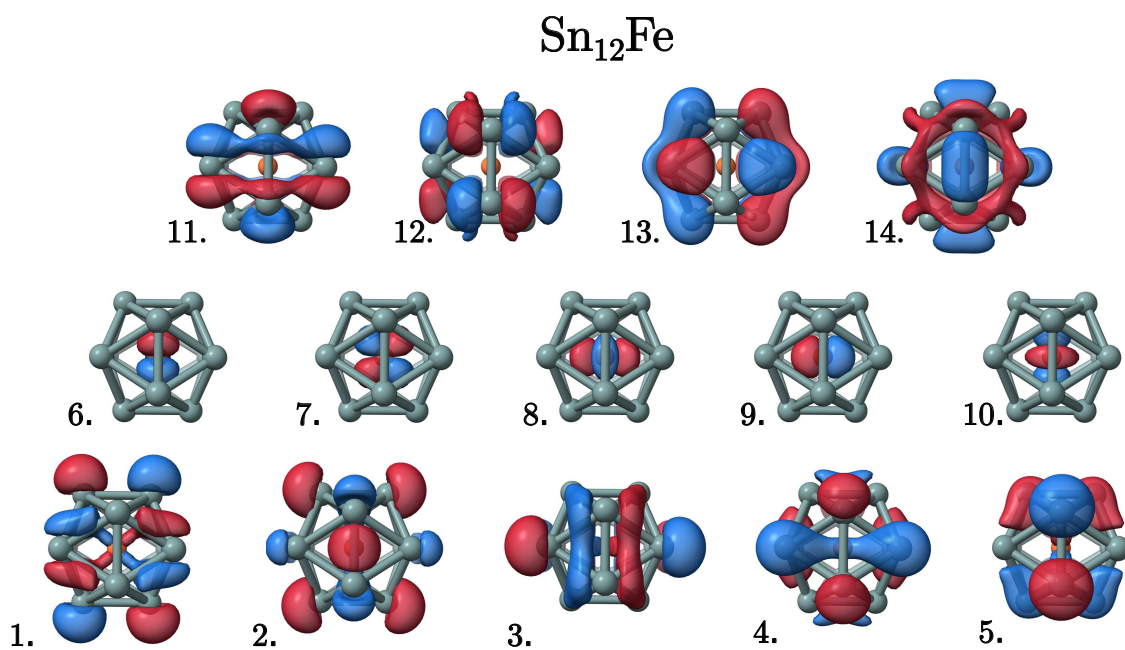

**Figure S5.** Active orbitals of  $\text{Sn}_{12}\text{Fe}$  in the CAS(16,14) calculation. The orbitals are in the order of the configurations shown in the tables below and grouped as described in the main text.

# Sn<sub>12</sub>Cr

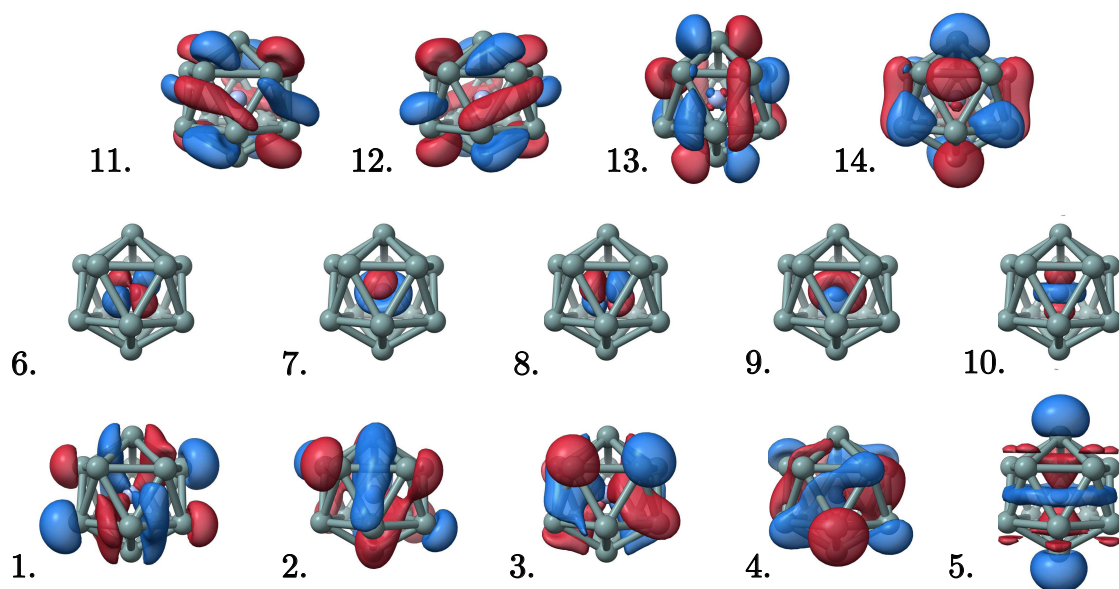

**Figure S6.** Active orbitals of Sn<sub>12</sub>Cr in the CAS(14,14) calculation. The orbitals are in the order of the configurations shown in the tables below and grouped as described in the main text.

**Table S2.** Excited states of  $\text{Sn}_{12}\text{Mn}$  in  $I_h$  symmetry. The excited states are sorted by their CASSCF energy. The occupation in the electronic configuration matches the ordering of the active orbitals presented above.

| Root | $E(\text{CASSCF})$ | $E(\text{NEVPT2})$ | Weight | Configuration    |
|------|--------------------|--------------------|--------|------------------|
| 0    | 0                  | 0.0                | 0.75   | 22222 11111 0000 |
| 1    | 17531.3            | 26459.9            | 0.72   | 22221 11211 0000 |
| 2    | 17538.2            | 26655.9            | 0.49   | 22221 11112 0000 |
| 3    | 17549.6            | 26387.9            | 0.5    | 22212 12111 0000 |
| 4    | 17557.4            | 26510.8            | 0.42   | 22212 21111 0000 |
| 5    | 17566.8            | 26635.2            | 0.23   | 21222 21111 0000 |
| 6    | 17579.8            | 26511.2            | 0.39   | 21222 11121 0000 |
| 7    | 17635.8            | 26498.8            | 0.3    | 12222 12111 0000 |
| 8    | 17653.5            | 26686.9            | 0.39   | 22221 12111 0000 |
| 9    | 17675.9            | 26638.1            | 0.38   | 22122 11112 0000 |
| 10   | 17677.7            | 26672.8            | 0.31   | 12222 11211 0000 |
| 11   | 17690.1            | 26739.4            | 0.29   | 22212 11211 0000 |
| 12   | 17694.8            | 26574.1            | 0.48   | 21222 12111 0000 |
| 13   | 17904.9            | 27034.1            | 0.36   | 22212 11112 0000 |
| 14   | 17918.9            | 27059.8            | 0.35   | 22212 11121 0000 |
| 15   | 17923.7            | 26829.0            | 0.54   | 22221 21111 0000 |
| 16   | 17958.9            | 26950.9            | 0.61   | 22122 12111 0000 |
| 17   | 17964.0            | 26988.0            | 0.33   | 12222 21111 0000 |
| 18   | 17986.2            | 26890.1            | 0.42   | 21222 11121 0000 |
| 19   | 18014.1            | 26901.1            | 0.61   | 12222 11112 0000 |
| 20   | 18022.3            | 26958.2            | 0.5    | 21222 11211 0000 |
| 21   | 18081.3            | 26926.1            | 0.27   | 22212 11211 0000 |
| 22   | 18082.5            | 26718.1            | 0.61   | 21222 11112 0000 |
| 23   | 18084.8            | 26901.1            | 0.36   | 22122 21111 0000 |
| 24   | 18114.5            | 26911.7            | 0.37   | 12222 11121 0000 |
| 25   | 19756.6            | 12600.2            | 0.59   | 22212 11111 0100 |
| 26   | 19777.0            | 12576.7            | 0.4    | 22221 11111 1000 |
| 27   | 19786.8            | 12604.3            | 0.37   | 22122 11111 1000 |
| 28   | 19792.2            | 12933.9            | 0.38   | 22221 11111 0100 |
| 29   | 19901.6            | 13002.7            | 0.26   | 22221 11111 0010 |
| 30   | 20109.3            | 12632.8            | 0.26   | 22122 11111 0100 |
| 31   | 20146.4            | 12905.2            | 0.27   | 21222 11111 0010 |
| 32   | 20219.0            | 12584.3            | 0.38   | 22122 11111 0010 |
| 33   | 20467.8            | 12567.2            | 0.26   | 21222 11111 0100 |
| 34   | 20511.8            | 12786.8            | 0.23   | 22212 11111 0010 |
| 35   | 20715.4            | 12873.4            | 0.15   | 21222 11111 0001 |
| 36   | 20720.8            | 12849.4            | 0.16   | 21222 11111 0001 |
| 37   | 20909.4            | 13125.4            | 0.17   | 22122 11111 0001 |
| 38   | 20956.7            | 12637.9            | 0.44   | 12222 11111 0001 |
| 39   | 21177.3            | 12786.0            | 0.28   | 21222 11111 0001 |
| 40   | 21434.5            | 13531.0            | 0.33   | 22122 11111 0100 |
| 41   | 21534.5            | 13474.1            | 0.31   | 22221 11111 0010 |
| 42   | 21903.1            | 13029.4            | 0.41   | 22221 11111 0001 |
| 43   | 22010.8            | 13068.7            | 0.39   | 22122 11111 0001 |
| 44   | 22041.7            | 13008.5            | 0.47   | 22212 11111 0001 |
| 45   | 25273.9            | 14568.4            | 0.64   | 22212 11111 0100 |
| 46   | 25288.1            | 14624.4            | 0.27   | 22122 11111 1000 |
| 47   | 25303.7            | 14576.0            | 0.42   | 22221 11111 1000 |
| 48   | 25336.5            | 14978.4            | 0.34   | 22122 11111 1000 |
| 49   | 25448.9            | 14980.0            | 0.31   | 22212 11111 1000 |
| 50   | 25654.1            | 15043.2            | 0.32   | 12222 11111 0100 |
| 51   | 25667.5            | 14920.8            | 0.26   | 22122 11111 0100 |
| 52   | 25788.8            | 14757.4            | 0.53   | 22122 11111 0010 |
| 53   | 25923.7            | 14989.1            | 0.37   | 22212 11111 0010 |
| 54   | 26051.3            | 15204.6            | 0.33   | 21222 11111 0100 |
| 55   | 26077.2            | 14737.2            | 0.47   | 12222 11111 0010 |
| 56   | 26273.2            | 14599.8            | 0.29   | 21222 11111 0001 |
| 57   | 26361.4            | 15090.2            | 0.39   | 22122 11111 0001 |
| 58   | 26374.0            | 14536.5            | 0.59   | 12222 11111 0001 |
| 59   | 26587.2            | 14710.9            | 0.34   | 21222 11111 0001 |

**Table S3.** Excited states of Sn<sub>12</sub>Mn in  $I_h$  symmetry for the CAS(15,10). The excited states are sorted by their CASSCF energy.

| Root | $E(\text{CASSCF})$ | $E(\text{NEVPT2})$ | Weight | Configuration |
|------|--------------------|--------------------|--------|---------------|
| 0    | 0                  | 0.0                | 0.59   | 22222 11111   |
| 1    | 15327.3            | 23726.4            | 0.77   | 21222 21111   |
| 2    | 15356.0            | 23949.6            | 0.65   | 12222 21111   |
| 3    | 15412.2            | 24121.0            | 0.49   | 22122 21111   |
| 4    | 15493.9            | 24255.3            | 0.39   | 22212 21111   |
| 5    | 15518.0            | 24216.0            | 0.47   | 22122 12111   |
| 6    | 15555.1            | 24112.4            | 0.58   | 22221 21111   |
| 7    | 15596.8            | 24293.6            | 0.44   | 22122 11211   |
| 8    | 15730.1            | 24313.7            | 0.51   | 22212 12111   |
| 9    | 15819.1            | 24493.3            | 0.26   | 12222 12111   |
| 10   | 15845.7            | 24407.7            | 0.37   | 22212 11211   |
| 11   | 15896.5            | 24584.6            | 0.34   | 21222 12111   |
| 12   | 15958.5            | 24302.9            | 0.49   | 21222 11211   |
| 13   | 16023.4            | 24458.6            | 0.35   | 22221 12111   |
| 14   | 16041.2            | 24417.6            | 0.38   | 22122 11211   |



**Table S4.** Excited states of  $\text{Sn}_{12}\text{Fe}$  in  $D_{2h}$  symmetry. The excited states are sorted by their CASSCF energy. The occupation in the electronic configuration matches the ordering of the active orbitals presented above.

| Root | $E(\text{CASSCF})$ | $E(\text{NEVPT2})$ | Weight | Configuration    |
|------|--------------------|--------------------|--------|------------------|
| 0    | 0                  | 0.0                | 0.4    | 22222 21111 0000 |
|      |                    |                    | 0.18   | 22212 21211 0000 |
| 1    | 0.6                | 221.1              | 0.31   | 22222 11211 0000 |
|      |                    |                    | 0.18   | 22221 21211 0000 |
| 2    | 93.4               | 460.4              | 0.42   | 22222 12111 0000 |
|      |                    |                    | 0.15   | 22221 22111 0000 |
| 3    | 253.9              | 362.7              | 0.42   | 22222 11121 0000 |
|      |                    |                    | 0.16   | 21222 11122 0000 |
| 4    | 335.0              | 447.2              | 0.32   | 22222 11112 0000 |
|      |                    |                    | 0.15   | 22212 11212 0000 |
| 5    | 7643.1             | 12203.5            | 0.33   | 22221 22111 0000 |
| 6    | 7715.2             | 12180.1            | 0.44   | 22212 22111 0000 |
| 7    | 7820.8             | 12312.0            | 0.46   | 22212 21211 0000 |
| 8    | 7823.8             | 12383.7            | 0.4    | 22221 21211 0000 |
| 9    | 7856.4             | 12169.7            | 0.92   | 22221 11212 0000 |
| 10   | 7876.0             | 12353.5            | 0.44   | 22221 12211 0000 |
| 11   | 7906.6             | 12324.6            | 0.74   | 22122 21211 0000 |
| 12   | 7963.0             | 12565.4            | 0.66   | 22221 12121 0000 |
| 13   | 7972.7             | 12642.2            | 0.41   | 22212 21121 0000 |
| 14   | 8057.2             | 12653.0            | 0.67   | 22212 12121 0000 |
| 15   | 8059.1             | 12455.8            | 0.79   | 22221 11122 0000 |
| 16   | 8209.3             | 12500.3            | 0.7    | 21222 21211 0000 |
| 17   | 8224.9             | 12846.9            | 0.19   | 22221 21121 0000 |
| 18   | 8291.6             | 12918.5            | 0.24   | 22212 12211 0000 |
| 19   | 8317.5             | 12909.2            | 0.68   | 22212 11122 0000 |
| 20   | 8367.7             | 13169.3            | 0.36   | 22122 22111 0000 |
| 21   | 8431.1             | 13184.1            | 0.34   | 22212 11212 0000 |
| 22   | 8480.7             | 13225.0            | 0.37   | 22122 11212 0000 |
| 23   | 8499.1             | 12929.5            | 0.72   | 21222 21121 0000 |
| 24   | 8515.5             | 13081.7            | 0.51   | 22122 12211 0000 |
| 25   | 8596.4             | 13301.8            | 0.53   | 22122 11212 0000 |
| 26   | 8782.5             | 13479.0            | 0.41   | 21222 12211 0000 |
| 27   | 8793.1             | 13450.6            | 0.39   | 21222 12121 0000 |
| 28   | 8974.5             | 12463.5            | 0.83   | 12222 21211 0000 |
| 29   | 9018.2             | 13313.2            | 0.41   | 12222 22111 0000 |
| 30   | 9177.3             | 13504.3            | 0.33   | 12222 12211 0000 |
| 31   | 9346.0             | 13672.7            | 0.48   | 12222 12121 0000 |
| 32   | 9390.3             | 13645.8            | 0.36   | 12222 21121 0000 |
| 33   | 9610.9             | 13351.9            | 0.94   | 12222 11212 0000 |
| 34   | 9812.3             | 13612.2            | 0.91   | 12222 11122 0000 |
| 35   | 17160.2            | 6021.6             | 0.11   | 22221 21111 1000 |
| 36   | 17332.8            | 6179.2             | 0.12   | 22221 21111 0100 |
| 37   | 17688.1            | 6461.5             | 0.11   | 22221 21111 0010 |
| 38   | 18009.8            | 6904.9             | 0.11   | 22221 21111 0001 |
| 39   | 19732.4            | 17171.6            | 0.28   | 22221 21112 0000 |
| 40   | 19843.3            | 16967.9            | 0.26   | 22212 11221 0000 |
| 41   | 19850.6            | 15757.5            | 0.13   | 22221 11221 0000 |
| 42   | 19939.4            | 10640.4            | 0.18   | 22212 11211 1000 |
| 43   | 19951.3            | 10480.1            | 0.29   | 22221 11112 0100 |
| 44   | 19981.0            | 10653.2            | 0.12   | 22221 21111 0100 |
| 45   | 20027.0            | 10680.8            | 0.23   | 22212 12111 1000 |
| 46   | 20032.5            | 10931.2            | 0.2    | 22221 12111 0100 |
| 47   | 20071.0            | 11678.3            | 0.15   | 22212 21111 1000 |
| 48   | 20099.1            | 12823.0            | 0.1    | 22122 11211 1000 |
| 49   | 20113.2            | 11314.6            | 0.16   | 22221 11121 0100 |
| 50   | 20151.5            | 11217.3            | 0.11   | 22122 11211 1000 |
| 51   | 20189.2            | 13614.6            | 0.08   | 21222 21112 0000 |
| 52   | 20196.1            | 11842.1            | 0.16   | 22221 11211 0100 |
| 53   | 20259.3            | 10641.2            | 0.22   | 22122 21111 1000 |
| 54   | 20288.9            | 14661.4            | 0.1    | 21222 21112 0000 |
| 55   | 20317.1            | 11216.5            | 0.17   | 22221 11112 1000 |
| 56   | 20376.9            | 10772.7            | 0.11   | 22212 11112 1000 |
| 57   | 20386.5            | 16171.1            | 0.16   | 22122 11221 0000 |
| 58   | 20463.7            | 10916.3            | 0.17   | 22212 11211 0100 |
| 59   | 20472.5            | 11717.2            | 0.11   | 22212 21111 1000 |

**Table S5.** Excited states of  $\text{Sn}_{12}\text{Fe}$  in  $D_{2h}$  symmetry for the CAS(16,10) active space. The excited states are sorted by their CASSCF energy.

| Root | $E(\text{CASSCF})$ | $E(\text{NEVPT2})$ | Weight | Configuration |
|------|--------------------|--------------------|--------|---------------|
| 0    | 0                  | 236.2              | 0.32   | 22222 12111   |
|      |                    |                    | 0.20   | 22221 22111   |
| 1    | 3.8                | 0.0                | 0.4    | 22222 21111   |
|      |                    |                    | 0.21   | 22212 22111   |
| 2    | 116.1              | 502.6              | 0.42   | 22222 11211   |
|      |                    |                    | 0.16   | 22221 21211   |
| 3    | 300.2              | 427.7              | 0.41   | 22222 11121   |
|      |                    |                    | 0.17   | 22221 21121   |
| 4    | 371.1              | 511.0              | 0.32   | 22222 11112   |
|      |                    |                    | 0.15   | 22212 12112   |
| 5    | 7833.5             | 12109.8            | 0.37   | 22212 21121   |
| 6    | 7911.0             | 12055.6            | 0.47   | 22212 21211   |
| 7    | 7944.9             | 12157.6            | 0.54   | 22212 22111   |
| 8    | 7991.0             | 12225.4            | 0.48   | 22221 22111   |
| 9    | 8036.3             | 12084.7            | 0.82   | 22122 22111   |
| 10   | 8059.2             | 12075.4            | 0.93   | 22221 12112   |
| 11   | 8169.1             | 12622.9            | 0.33   | 22212 21121   |
| 12   | 8172.9             | 12298.9            | 0.48   | 22221 11212   |
| 13   | 8265.6             | 12518.4            | 0.69   | 22221 11221   |
| 14   | 8273.0             | 12265.3            | 0.78   | 22221 11122   |
| 15   | 8292.3             | 12649.2            | 0.5    | 22212 11221   |
| 16   | 8375.3             | 12533.2            | 0.52   | 21222 22111   |
| 17   | 8459.0             | 12867.8            | 0.21   | 22221 21121   |
| 18   | 8504.0             | 12794.1            | 0.78   | 22212 11122   |
| 19   | 8551.1             | 12959.6            | 0.28   | 22122 11221   |
| 20   | 8577.8             | 13089.1            | 0.35   | 22212 12112   |
| 21   | 8632.4             | 13039.3            | 0.4    | 22122 21211   |
| 22   | 8642.9             | 12990.3            | 0.36   | 22122 12112   |
| 23   | 8729.5             | 12760.7            | 0.71   | 21222 21121   |
| 24   | 8730.5             | 12987.3            | 0.38   | 22122 12211   |
| 25   | 8738.6             | 12432.6            | 0.69   | 12222 22111   |
| 26   | 8792.3             | 13149.0            | 0.49   | 22122 12112   |
| 27   | 8905.7             | 13131.6            | 0.3    | 12222 21211   |
| 28   | 9092.3             | 13297.7            | 0.43   | 21222 12211   |
| 29   | 9121.1             | 13047.5            | 0.6    | 12222 21121   |

**Table S6.** Excited states of  $\text{Sn}_{12}\text{Cr}$  in  $D_{5d}$  symmetry. The excited states are sorted by their CASSCF energy. The occupation in the electronic configuration matches the ordering of the active orbitals presented above.

| Root | $E(\text{CASSCF})$ | $E(\text{NEVPT2})$ | Weight | Configuration    |
|------|--------------------|--------------------|--------|------------------|
| 0    | 0                  | 0.0                | 0.84   | 22222 11110 0000 |
| 1    | 837.0              | 1060.8             | 0.56   | 22222 11101 0000 |
|      |                    |                    | 0.29   | 22222 10111 0000 |
| 2    | 849.0              | 1094.2             | 0.57   | 22222 11011 0000 |
|      |                    |                    | 0.27   | 22222 01111 0000 |
| 3    | 1073.5             | 1384.8             | 0.56   | 22222 10111 0000 |
|      |                    |                    | 0.28   | 22222 11101 0000 |
| 4    | 1077.5             | 1380.8             | 0.58   | 22222 01111 0000 |
|      |                    |                    | 0.27   | 22222 11011 0000 |
| 5    | 13593.0            | 6744.8             | 0.1    | 22222 11100 1000 |
| 6    | 13769.0            | 6585.7             | 0.22   | 22222 11010 1000 |
| 7    | 13789.9            | 6677.2             | 0.24   | 22222 11100 0100 |
| 8    | 13916.7            | 6839.5             | 0.14   | 22222 10110 1000 |
| 9    | 14473.3            | 7296.5             | 0.08   | 22222 11010 0010 |
| 10   | 14483.0            | 7262.5             | 0.07   | 22222 10110 1000 |
| 11   | 14562.3            | 7458.2             | 0.09   | 22222 11010 0100 |
| 12   | 14605.8            | 7535.0             | 0.09   | 22222 01110 1000 |
| 13   | 14806.8            | 7857.3             | 0.21   | 22222 11010 0010 |
| 14   | 14830.4            | 7870.8             | 0.2    | 22222 11100 0010 |
| 15   | 15001.9            | 7959.4             | 0.13   | 22222 11010 0001 |
| 16   | 15052.6            | 7953.6             | 0.12   | 22222 11100 0001 |
| 17   | 15218.7            | 8112.6             | 0.29   | 22222 10110 0001 |
| 18   | 15297.7            | 8044.0             | 0.23   | 22222 01110 0001 |
| 19   | 15322.0            | 8083.6             | 0.37   | 22222 01110 0010 |
| 20   | 15339.1            | 8012.7             | 0.3    | 22222 10110 0010 |
| 21   | 15685.8            | 8085.7             | 0.31   | 22222 11001 1000 |
| 22   | 15690.9            | 8098.7             | 0.31   | 22222 11001 0100 |
| 23   | 15848.6            | 8272.4             | 0.19   | 22222 10101 1000 |
| 24   | 15861.7            | 8285.6             | 0.19   | 22222 10101 0100 |
| 25   | 16130.8            | 8152.0             | 0.28   | 22222 00111 1000 |
| 26   | 16141.5            | 8157.9             | 0.28   | 22222 00111 0100 |
| 27   | 16689.7            | 8728.3             | 0.1    | 22222 11001 0010 |
| 28   | 16755.1            | 8593.6             | 0.04   | 22222 10101 1000 |
| 29   | 16985.4            | 8575.7             | 0.11   | 22222 01101 0100 |
| 30   | 16994.1            | 8552.7             | 0.12   | 22222 10011 1000 |
| 31   | 17137.3            | 9085.4             | 0.24   | 22222 11001 0010 |
| 32   | 17328.5            | 9342.5             | 0.17   | 22222 00111 0001 |
| 33   | 17572.8            | 9418.3             | 0.25   | 22222 11001 0001 |
| 34   | 17656.1            | 9597.1             | 0.18   | 22222 01011 0001 |
| 35   | 17715.8            | 9597.5             | 0.14   | 22222 00111 0001 |
| 36   | 17861.7            | 9505.4             | 0.33   | 22222 00111 0010 |
| 37   | 18066.6            | 9319.8             | 0.16   | 22222 10011 0100 |
| 38   | 18067.3            | 9311.8             | 0.16   | 22222 01101 1000 |
| 39   | 18582.2            | 9920.2             | 0.08   | 22222 01011 0010 |
| 40   | 18603.5            | 9995.9             | 0.09   | 22222 10101 0001 |
| 41   | 18763.6            | 10086.5            | 0.07   | 22222 01101 0010 |
| 42   | 18772.6            | 10097.0            | 0.06   | 22222 10011 0001 |
| 43   | 19902.9            | 10616.0            | 0.14   | 22222 10011 0001 |
| 44   | 19922.1            | 10615.0            | 0.13   | 22222 01101 0010 |
| 45   | 22905.9            | 13764.3            | 0.62   | 22221 11110 1000 |
| 46   | 22911.6            | 13781.9            | 0.61   | 22221 11110 0100 |
| 47   | 22951.3            | 14023.0            | 0.76   | 22221 11110 0010 |
| 48   | 22956.5            | 13971.1            | 0.77   | 22221 11110 0001 |
| 49   | 23242.7            | 13820.0            | 0.57   | 22221 11011 0010 |
| 50   | 23257.8            | 13874.2            | 0.54   | 22221 11101 0010 |
| 51   | 23306.8            | 13964.7            | 0.35   | 22221 11101 0001 |
| 52   | 23323.4            | 14012.9            | 0.36   | 22221 01111 0001 |
| 53   | 23385.6            | 13788.6            | 0.51   | 22221 10111 0001 |
| 54   | 23496.8            | 13445.5            | 0.09   | 22221 11011 0100 |
| 55   | 23516.4            | 14293.1            | 0.41   | 22221 10111 0010 |
| 56   | 23530.7            | 13945.9            | 0.44   | 22221 01111 0010 |
| 57   | 23578.0            | 13293.1            | 0.14   | 22221 11011 1000 |
| 58   | 23651.5            | 13557.9            | 0.2    | 22221 11101 0100 |
| 59   | 23694.0            | 13541.2            | 0.14   | 22221 11011 0100 |

**Table S7.** Excited states 60 to 79 of Sn<sub>12</sub>Cr in  $D_{5d}$  symmetry. The excited states are sorted by their CASSCF energy. The occupation in the electronic configuration matches the ordering of the active orbitals presented above.

| Root | $E(\text{CASSCF})$ | $E(\text{NEVPT2})$ | Weight | Configuration    |
|------|--------------------|--------------------|--------|------------------|
| 60   | 23806.1            | 14366.5            | 0.26   | 22221 01111 0001 |
| 61   | 24075.3            | 13858.3            | 0.21   | 22221 10111 1000 |
| 62   | 24107.1            | 13818.4            | 0.45   | 22221 10111 0100 |
| 63   | 24126.0            | 13952.8            | 0.35   | 22221 01111 0100 |
| 64   | 24132.8            | 13888.8            | 0.47   | 22221 01111 1000 |
| 65   | 24807.1            | 15039.9            | 0.20   | 22212 11110 1000 |
| 66   | 25015.8            | 14953.5            | 0.43   | 22212 11110 0100 |
| 67   | 25018.6            | 14787.1            | 0.39   | 22122 11110 1000 |
| 68   | 25183.3            | 16706.3            | 0.46   | 22221 11110 0010 |
| 69   | 25223.8            | 17489.8            | 0.63   | 22221 11110 0001 |
| 70   | 25312.5            | 16399.4            | 0.28   | 22221 11110 0100 |
| 71   | 25333.6            | 16735.7            | 0.34   | 22221 11110 0100 |
| 72   | 25338.5            | 16822.7            | 0.49   | 22221 11110 1000 |
| 73   | 25470.7            | 14847.8            | 0.18   | 22212 11011 0100 |
| 74   | 25483.9            | 14848.4            | 0.20   | 22122 11101 1000 |
| 75   | 25717.2            | 15218.2            | 0.06   | 21222 11110 1000 |
| 76   | 25732.8            | 15142.9            | 0.12   | 22212 11011 0100 |
| 77   | 25770.5            | 15063.0            | 0.24   | 22122 01111 1000 |
| 78   | 25786.6            | 15210.2            | 0.12   | 22212 10111 0100 |
| 79   | 25863.8            | 15474.3            | 0.15   | 21222 11110 0100 |

**Table S8.** Excited states of  $\text{Sn}_{12}\text{Cr}$  in  $D_{5d}$  symmetry for the CAS(14,10) active space. The excited states are sorted by their CASSCF energy.

| Root | $E(\text{CASSCF})$ | $E(\text{NEVPT2})$ | Weight | Configuration |
|------|--------------------|--------------------|--------|---------------|
| 0    | 0                  | 75.9               | 0.54   | 22221 11111   |
| 1    | 1898.9             | 0.0                | 0.44   | 12222 11111   |
| 2    | 1898.9             | 20.2               | 0.44   | 21222 11111   |
| 3    | 1991.1             | 137.8              | 0.54   | 22212 11111   |
| 4    | 2023.8             | 91.5               | 0.54   | 22122 11111   |
| 5    | 18290.8            | 11102.6            | 0.43   | 22221 11111   |
| 6    | 19143.3            | 12042.0            | 0.41   | 22212 11111   |
| 7    | 19178.2            | 12038.1            | 0.4    | 22122 11111   |
| 8    | 19425.6            | 12773.3            | 0.38   | 12222 11111   |
| 9    | 19425.7            | 12791.8            | 0.38   | 21222 11111   |
| 10   | 27486.1            | 21541.6            | 0.5    | 22221 11102   |
| 11   | 27486.2            | 21531.0            | 0.97   | 22221 11111   |
| 12   | 27543.9            | 21578.1            | 0.16   | 22221 12110   |
| 13   | 27544.5            | 21566.7            | 0.16   | 22221 11210   |
| 14   | 27915.8            | 21860.7            | 0.22   | 22221 12011   |

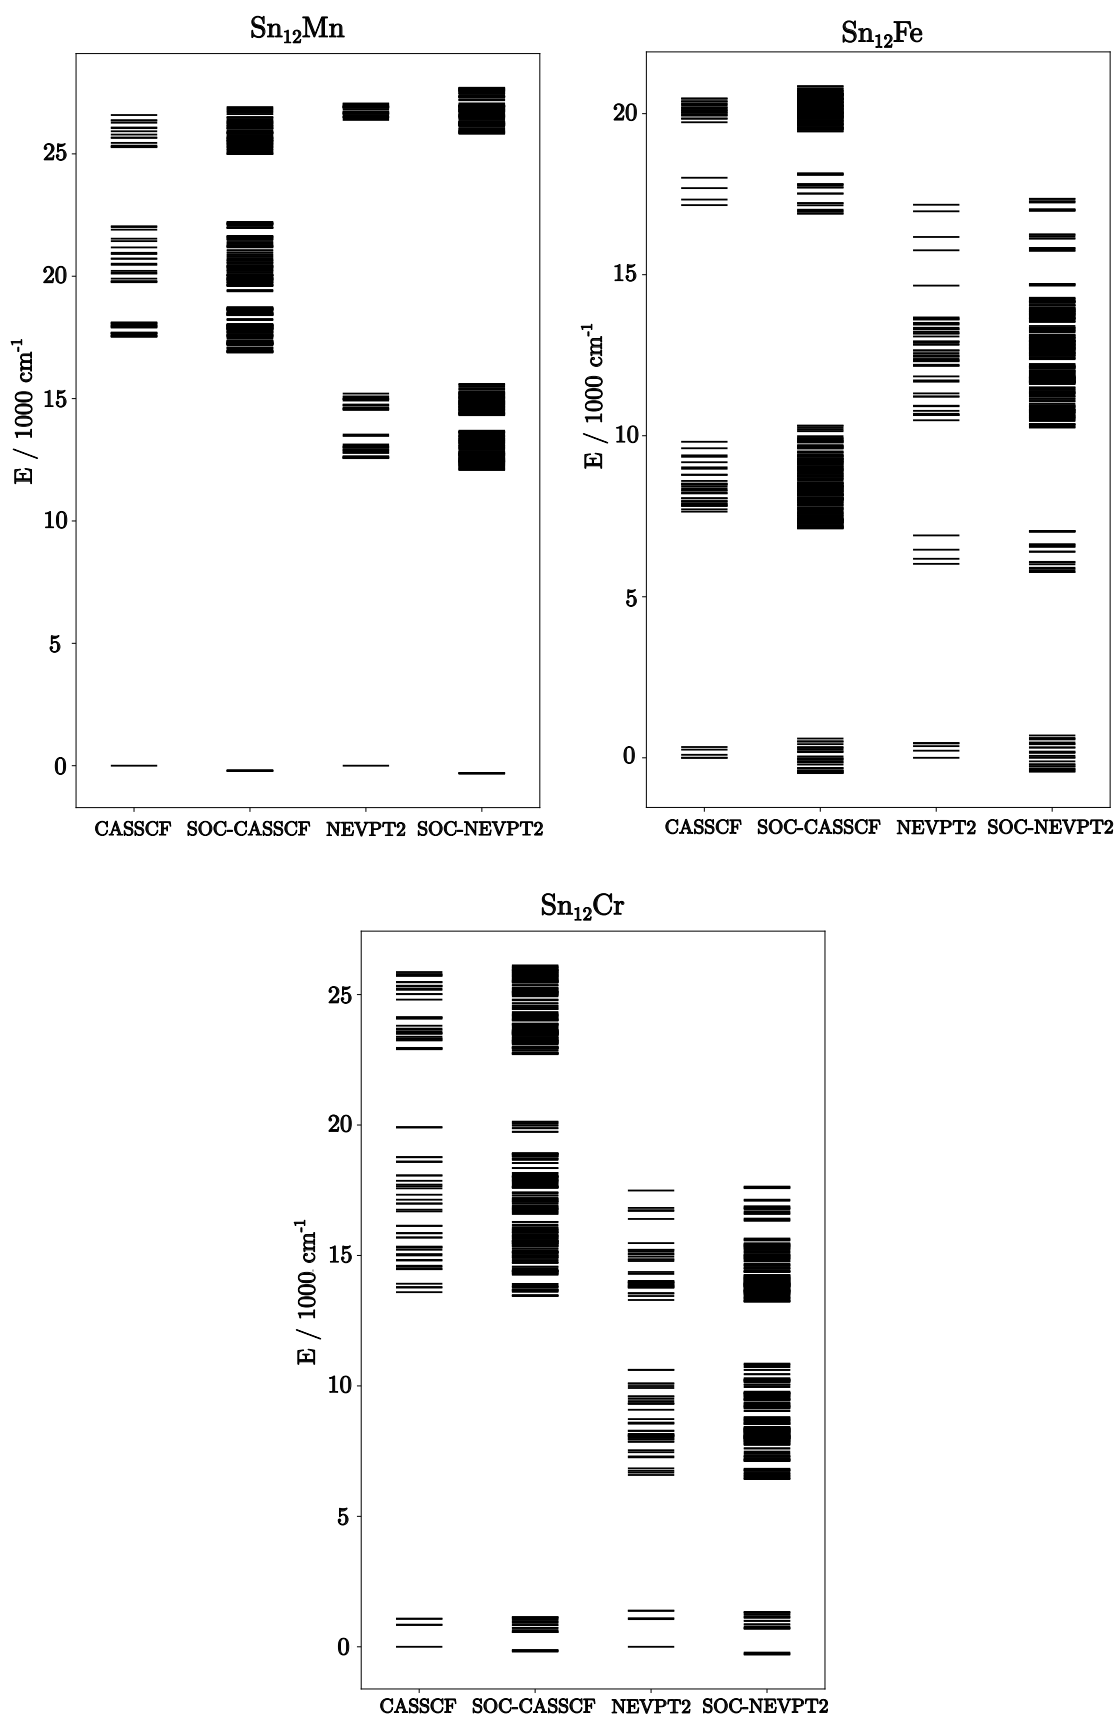

**Figure S7.** Energy levels of the ground and excited states of a)  $\text{Sn}_{12}\text{Mn}$  b)  $\text{Sn}_{12}\text{Fe}$  and c)  $\text{Sn}_{12}\text{Cr}$  at different levels of theory, indicated on the bottom of the plot. The active space always contains the 14 orbitals as shown above and the calculations are done with the (SARC)-DKH-TZVP basis set.

## 5 Geometric structures

**Table S9.** Cartesian coordinates of Sn<sub>12</sub>Mn in  $I_h$  symmetry in in Angstroms.

|    |                 |                 |                 |
|----|-----------------|-----------------|-----------------|
| Mn | -0.000006000000 | 0.000074000000  | 0.000001000000  |
| Sn | 1.662298000000  | 1.424738000000  | 2.158053000000  |
| Sn | 1.547861000000  | 2.504003000000  | -0.886672000000 |
| Sn | -1.182520000000 | 0.047671000000  | 2.837112000000  |
| Sn | -3.055104000000 | 0.275164000000  | 0.212239000000  |
| Sn | -1.367523000000 | 1.793062000000  | -2.089212000000 |
| Sn | -1.070726000000 | 2.703509000000  | 0.998026000000  |
| Sn | 1.071064000000  | -2.703385000000 | -0.997861000000 |
| Sn | 1.367084000000  | -1.793415000000 | 2.089276000000  |
| Sn | 3.055029000000  | -0.275207000000 | -0.212019000000 |
| Sn | 1.182573000000  | -0.047564000000 | -2.837024000000 |
| Sn | -1.547911000000 | -2.503812000000 | 0.886318000000  |
| Sn | -1.662122000000 | -1.424801000000 | -2.158237000000 |

**Table S10.** Cartesian coordinates of Sn<sub>12</sub>Mn in  $D_{2h}$  symmetry in in Angstroms.

|    |              |              |              |
|----|--------------|--------------|--------------|
| Mn | 0.000000000  | 0.000000000  | 0.000000000  |
| Sn | -1.614451008 | 0.000000000  | 2.584331317  |
| Sn | 0.000000000  | 2.632180353  | 1.593247014  |
| Sn | -2.615038889 | -1.638721192 | 0.000000000  |
| Sn | -1.614451008 | 0.000000000  | -2.584331317 |
| Sn | 0.000000000  | 2.632180353  | -1.593247014 |
| Sn | -2.615038889 | 1.638721192  | 0.000000000  |
| Sn | 2.615038889  | -1.638721192 | 0.000000000  |
| Sn | 0.000000000  | -2.632180353 | 1.593247014  |
| Sn | 1.614451008  | 0.000000000  | 2.584331317  |
| Sn | 2.615038889  | 1.638721192  | 0.000000000  |
| Sn | 0.000000000  | -2.632180353 | -1.593247014 |
| Sn | 1.614451008  | 0.000000000  | -2.584331317 |

**Table S11.** Cartesian coordinates of Sn<sub>12</sub>Mn in  $D_{3d}$  symmetry in in Angstroms.

|    |              |              |              |
|----|--------------|--------------|--------------|
| Mn | 0.000000000  | 0.000000000  | 0.000000000  |
| Sn | -1.599544557 | -0.923497481 | 2.458261468  |
| Sn | 1.599544557  | -0.923497481 | 2.458261468  |
| Sn | -2.622016723 | 1.513822061  | 0.585406370  |
| Sn | 0.000000000  | 3.027644121  | -0.585406370 |
| Sn | 2.622016723  | 1.513822061  | 0.585406370  |
| Sn | 0.000000000  | 1.846994962  | 2.458261468  |
| Sn | 0.000000000  | -1.846994962 | -2.458261468 |
| Sn | -2.622016723 | -1.513822061 | -0.585406370 |
| Sn | 0.000000000  | -3.027644121 | 0.585406370  |
| Sn | 2.622016723  | -1.513822061 | -0.585406370 |
| Sn | -1.599544557 | 0.923497481  | -2.458261468 |
| Sn | 1.599544557  | 0.923497481  | -2.458261468 |

**Table S12.** Cartesian coordinates of Sn<sub>12</sub>Mn in  $D_{5d}$  symmetry in in Angstroms.

|    |              |              |              |
|----|--------------|--------------|--------------|
| Mn | 0.000000000  | 0.000000000  | 0.000000000  |
| Sn | -2.614542897 | -0.849516484 | 1.389528125  |
| Sn | -1.615876376 | 2.224063029  | 1.389528125  |
| Sn | -1.615876376 | -2.224063029 | -1.389528125 |
| Sn | 0.000000000  | 0.000000000  | -3.032676209 |
| Sn | 0.000000000  | 2.749093090  | -1.389528125 |
| Sn | -2.614542897 | 0.849516484  | -1.389528125 |
| Sn | 2.614542897  | -0.849516484 | 1.389528125  |
| Sn | 0.000000000  | -2.749093090 | 1.389528125  |
| Sn | 0.000000000  | 0.000000000  | 3.032676209  |
| Sn | 1.615876376  | 2.224063029  | 1.389528125  |
| Sn | 1.615876376  | -2.224063029 | -1.389528125 |
| Sn | 2.614542897  | 0.849516484  | -1.389528125 |

**Table S13.** Cartesian coordinates of Sn<sub>12</sub>Mn in  $T_h$  symmetry in in Angstroms.

|    |              |              |              |
|----|--------------|--------------|--------------|
| Mn | 0.000000000  | 0.000000000  | 0.000000000  |
| Sn | 0.000000000  | -1.597922819 | -2.578508528 |
| Sn | -2.578508528 | 0.000000000  | -1.597922819 |
| Sn | 2.578508528  | 0.000000000  | -1.597922819 |
| Sn | 1.597922824  | 2.578508536  | 0.000000000  |
| Sn | -1.597922815 | 2.578508521  | 0.000000000  |
| Sn | 0.000000000  | 1.597922819  | -2.578508528 |
| Sn | 0.000000000  | -1.597922819 | 2.578508528  |
| Sn | 1.597922815  | -2.578508521 | 0.000000000  |
| Sn | -1.597922824 | -2.578508536 | 0.000000000  |
| Sn | -2.578508528 | 0.000000000  | 1.597922819  |
| Sn | 2.578508528  | 0.000000000  | 1.597922819  |
| Sn | 0.000000000  | 1.597922819  | 2.578508528  |



**Table S14.** Cartesian coordinates of Sn<sub>12</sub>Fe in  $D_{2h}$  symmetry in in Angstroms.

|    |                 |                 |                 |
|----|-----------------|-----------------|-----------------|
| Fe | 0.000007000000  | 0.000024000000  | -0.000024000000 |
| Sn | -0.026669000000 | 2.544849000000  | 1.558700000000  |
| Sn | -2.568220000000 | 1.564311000000  | -0.007629000000 |
| Sn | -0.017663000000 | 2.544082000000  | -1.560014000000 |
| Sn | -1.581052000000 | -0.013086000000 | 2.497370000000  |
| Sn | 2.540563000000  | 1.608784000000  | 0.006799000000  |
| Sn | 1.566374000000  | 0.014296000000  | 2.506185000000  |
| Sn | 2.568216000000  | -1.564315000000 | 0.007624000000  |
| Sn | -2.540559000000 | -1.608780000000 | -0.006803000000 |
| Sn | -1.566372000000 | -0.014303000000 | -2.506194000000 |
| Sn | 0.026663000000  | -2.544860000000 | -1.558666000000 |
| Sn | 1.581055000000  | 0.013077000000  | -2.497378000000 |
| Sn | 0.017660000000  | -2.544067000000 | 1.560019000000  |

**Table S15.** Cartesian coordinates of Sn<sub>12</sub>Cr in  $D_{5d}$  symmetry in in Angstroms.

|    |                 |                 |                 |
|----|-----------------|-----------------|-----------------|
| Cr | 0.000000000000  | 0.000003000000  | -0.000019000000 |
| Sn | -0.000007000000 | 0.000002000000  | 2.909545000000  |
| Sn | 0.852758000000  | -2.547124000000 | 1.352624000000  |
| Sn | -2.158970000000 | -1.598134000000 | 1.352620000000  |
| Sn | 2.686004000000  | 0.023908000000  | 1.352611000000  |
| Sn | -2.187078000000 | 1.559459000000  | 1.352624000000  |
| Sn | 0.807286000000  | 2.561905000000  | 1.352633000000  |
| Sn | -0.852759000000 | 2.547128000000  | -1.352623000000 |
| Sn | 2.187082000000  | -1.559460000000 | -1.352622000000 |
| Sn | -0.807288000000 | -2.561908000000 | -1.352629000000 |
| Sn | 0.000006000000  | -0.000008000000 | -2.909563000000 |
| Sn | -2.686011000000 | -0.023909000000 | -1.352601000000 |
| Sn | 2.158976000000  | 1.598138000000  | -1.352609000000 |

## 6 Density of states plots

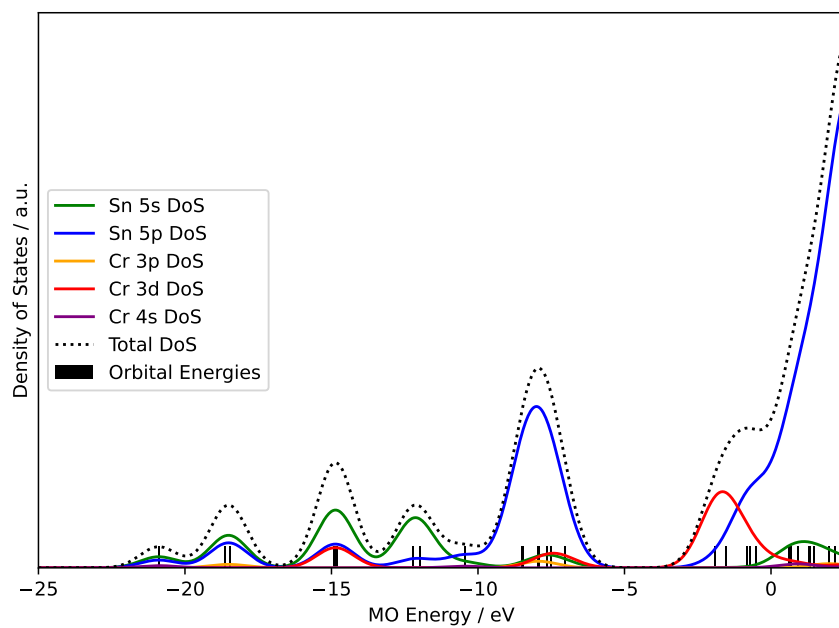

**Figure S8.** Density of states plot for  $\text{Sn}_{12}\text{Cr}$  based on Löwdin orbital compositions which are obtained from ORCA. To obtain the plot, every MO energy is convoluted with a Gaussian of  $\sigma^2 = 0.4$  eV.

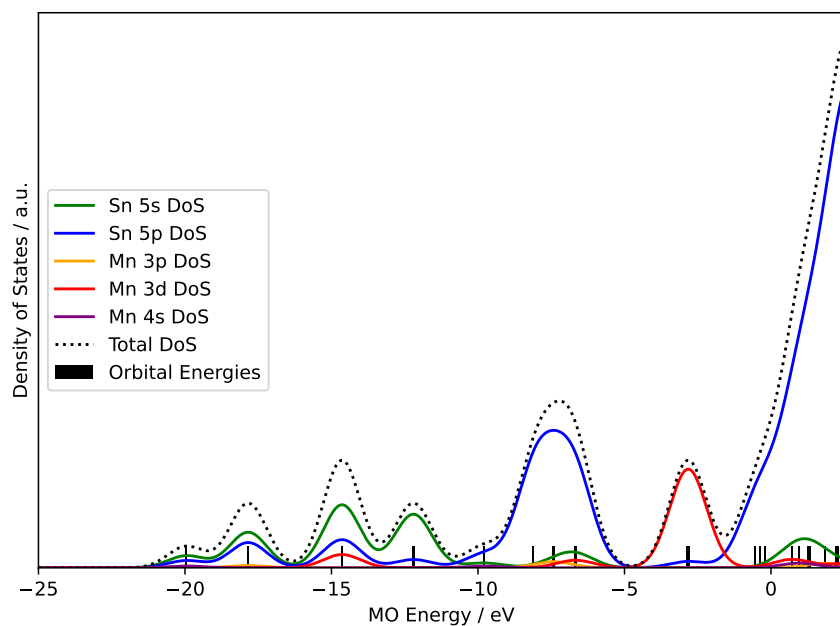

**Figure S9.** Density of states plot for  $\text{Sn}_{12}\text{Mn}$  based on Löwdin orbital compositions which are obtained from ORCA. To obtain the plot, every MO energy is convoluted with a Gaussian of  $\sigma^2 = 0.4$  eV.

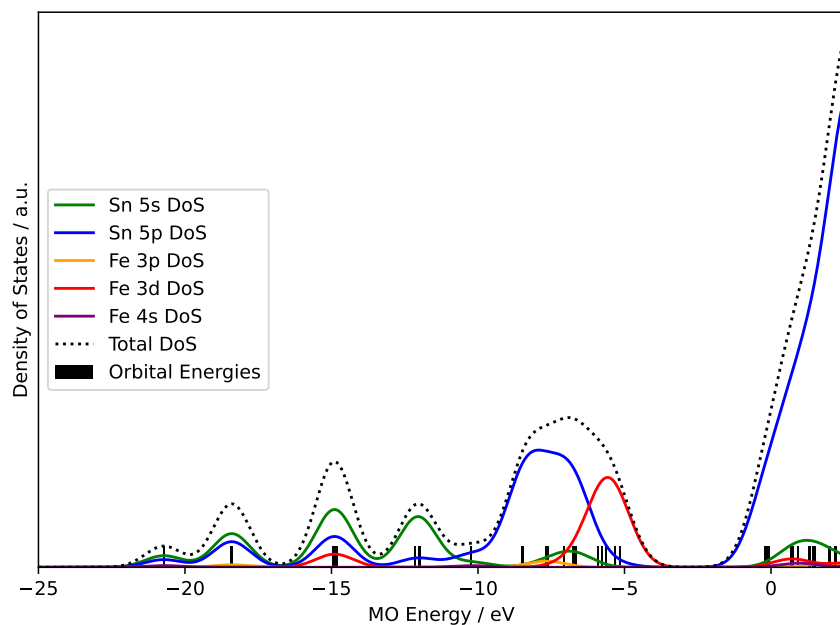

**Figure S10.** Density of states plot for  $\text{Sn}_{12}\text{Fe}$  based on Löwdin orbital compositions which are obtained from ORCA. To obtain the plot, every MO energy is convoluted with a Gaussian of  $\sigma^2 = 0.4$  eV.
