# Supplementary figures and images for: Magnetism of transition-metal-doped tetrel nanoclusters: multi-reference character and spin–orbit effects in Sn12TM (TM = Cr, Mn, Fe)
Source: Royal Society of Chemistry journal article supplement (doi:10.1039/d4nr03920c), 2025-01-01

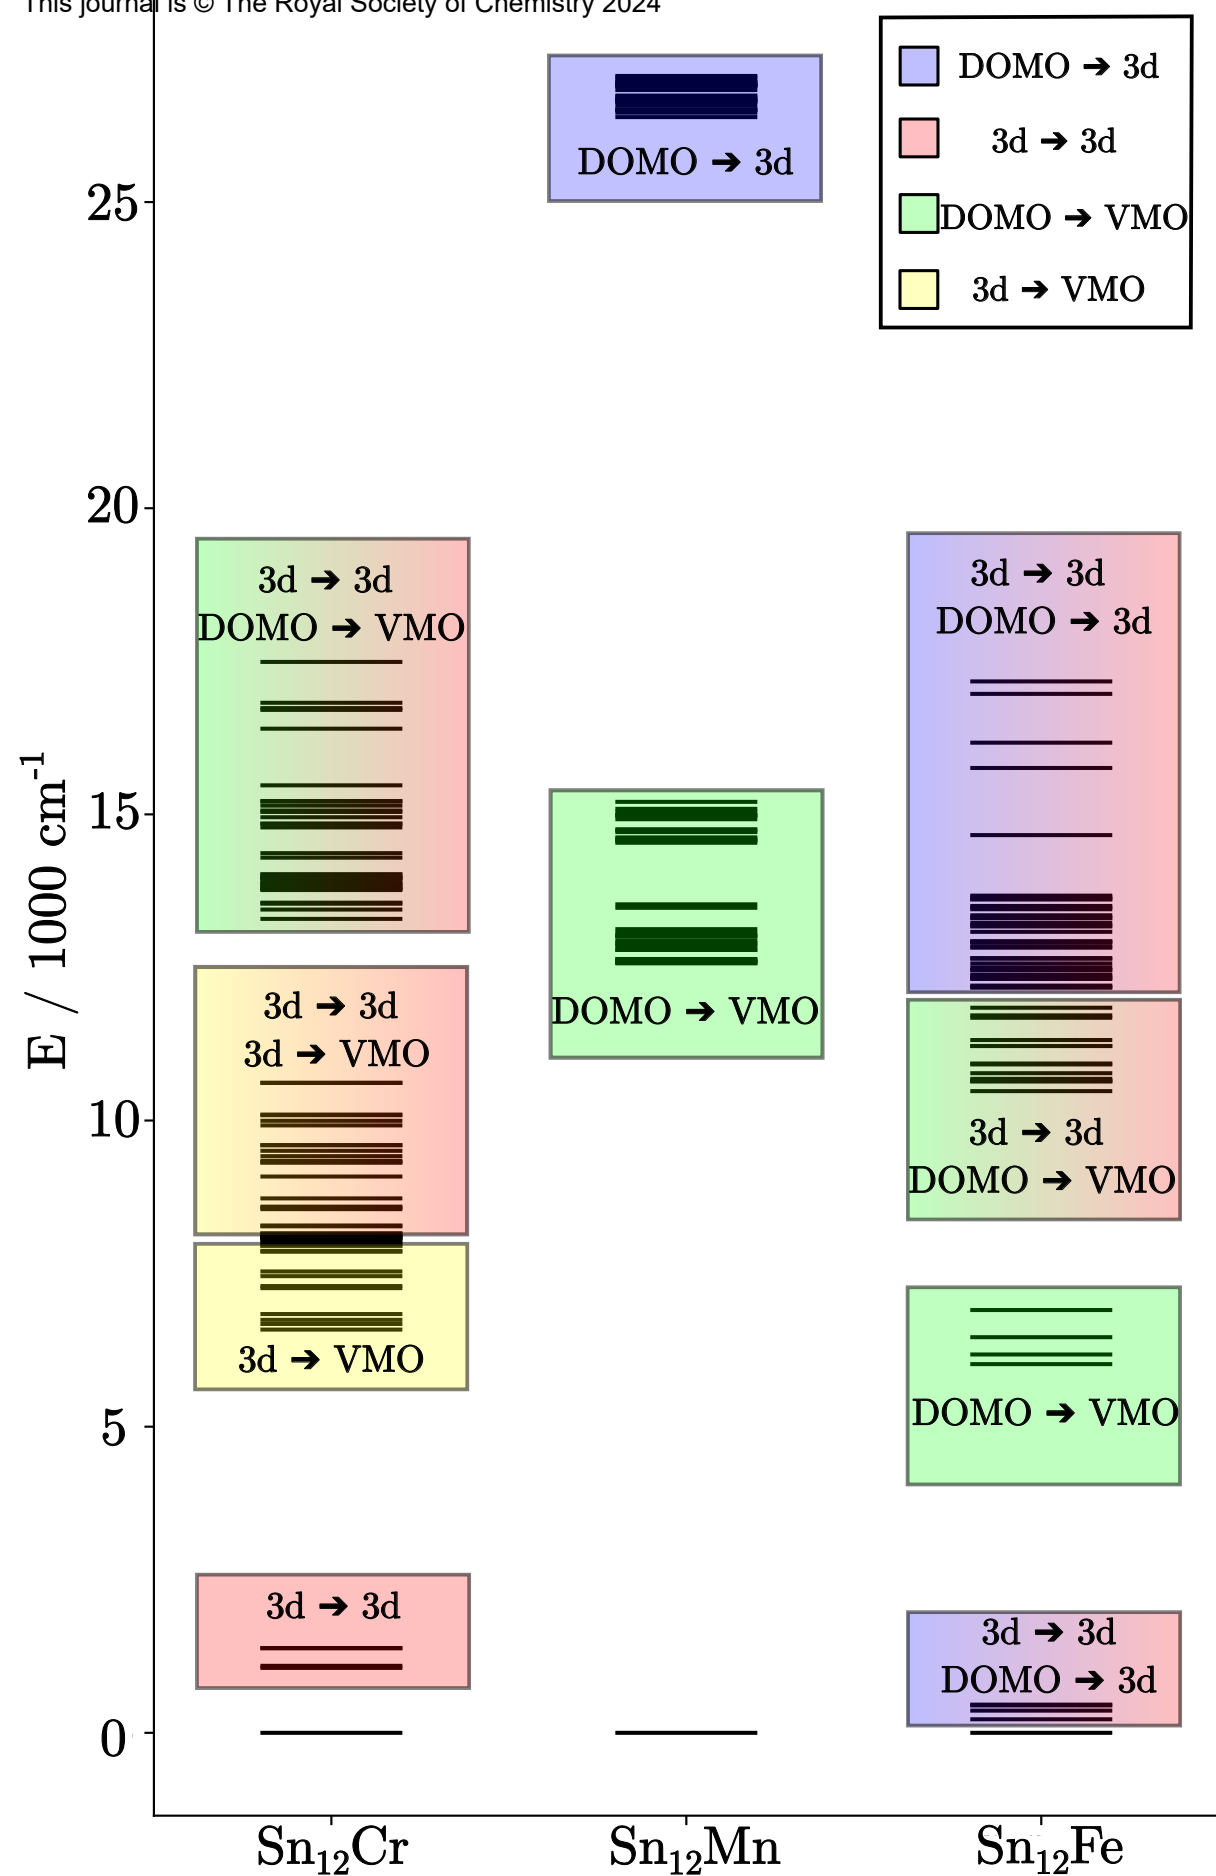

Supplement: d4nr03920c1.pdf [file d4nr03920c1.pdf]

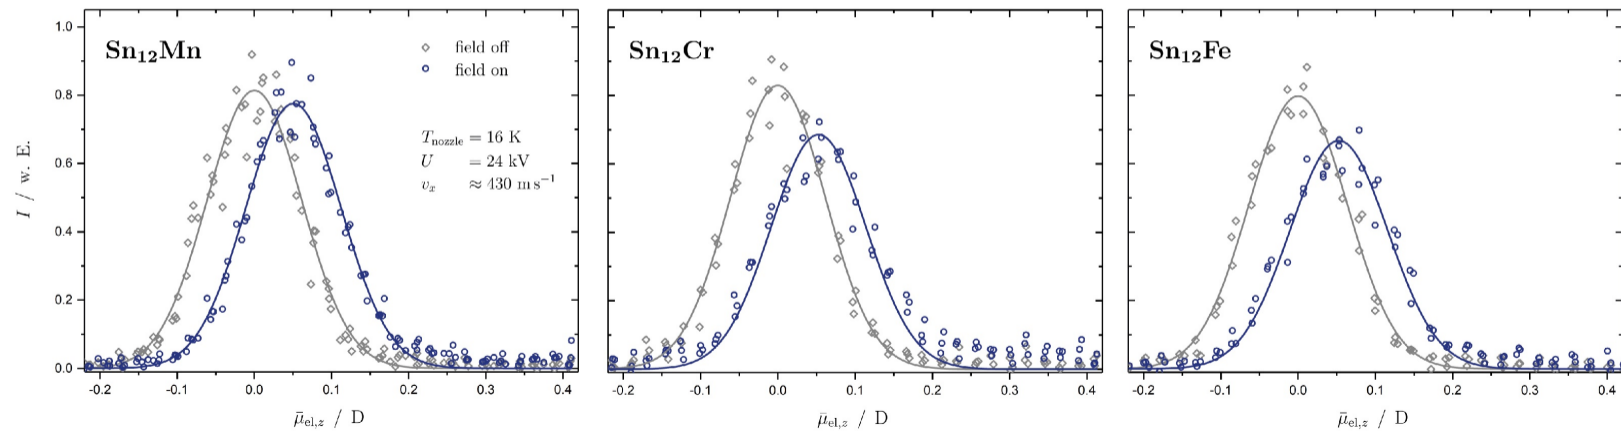

Supplement: d4nr03920c2.pdf [file d4nr03920c2.pdf]

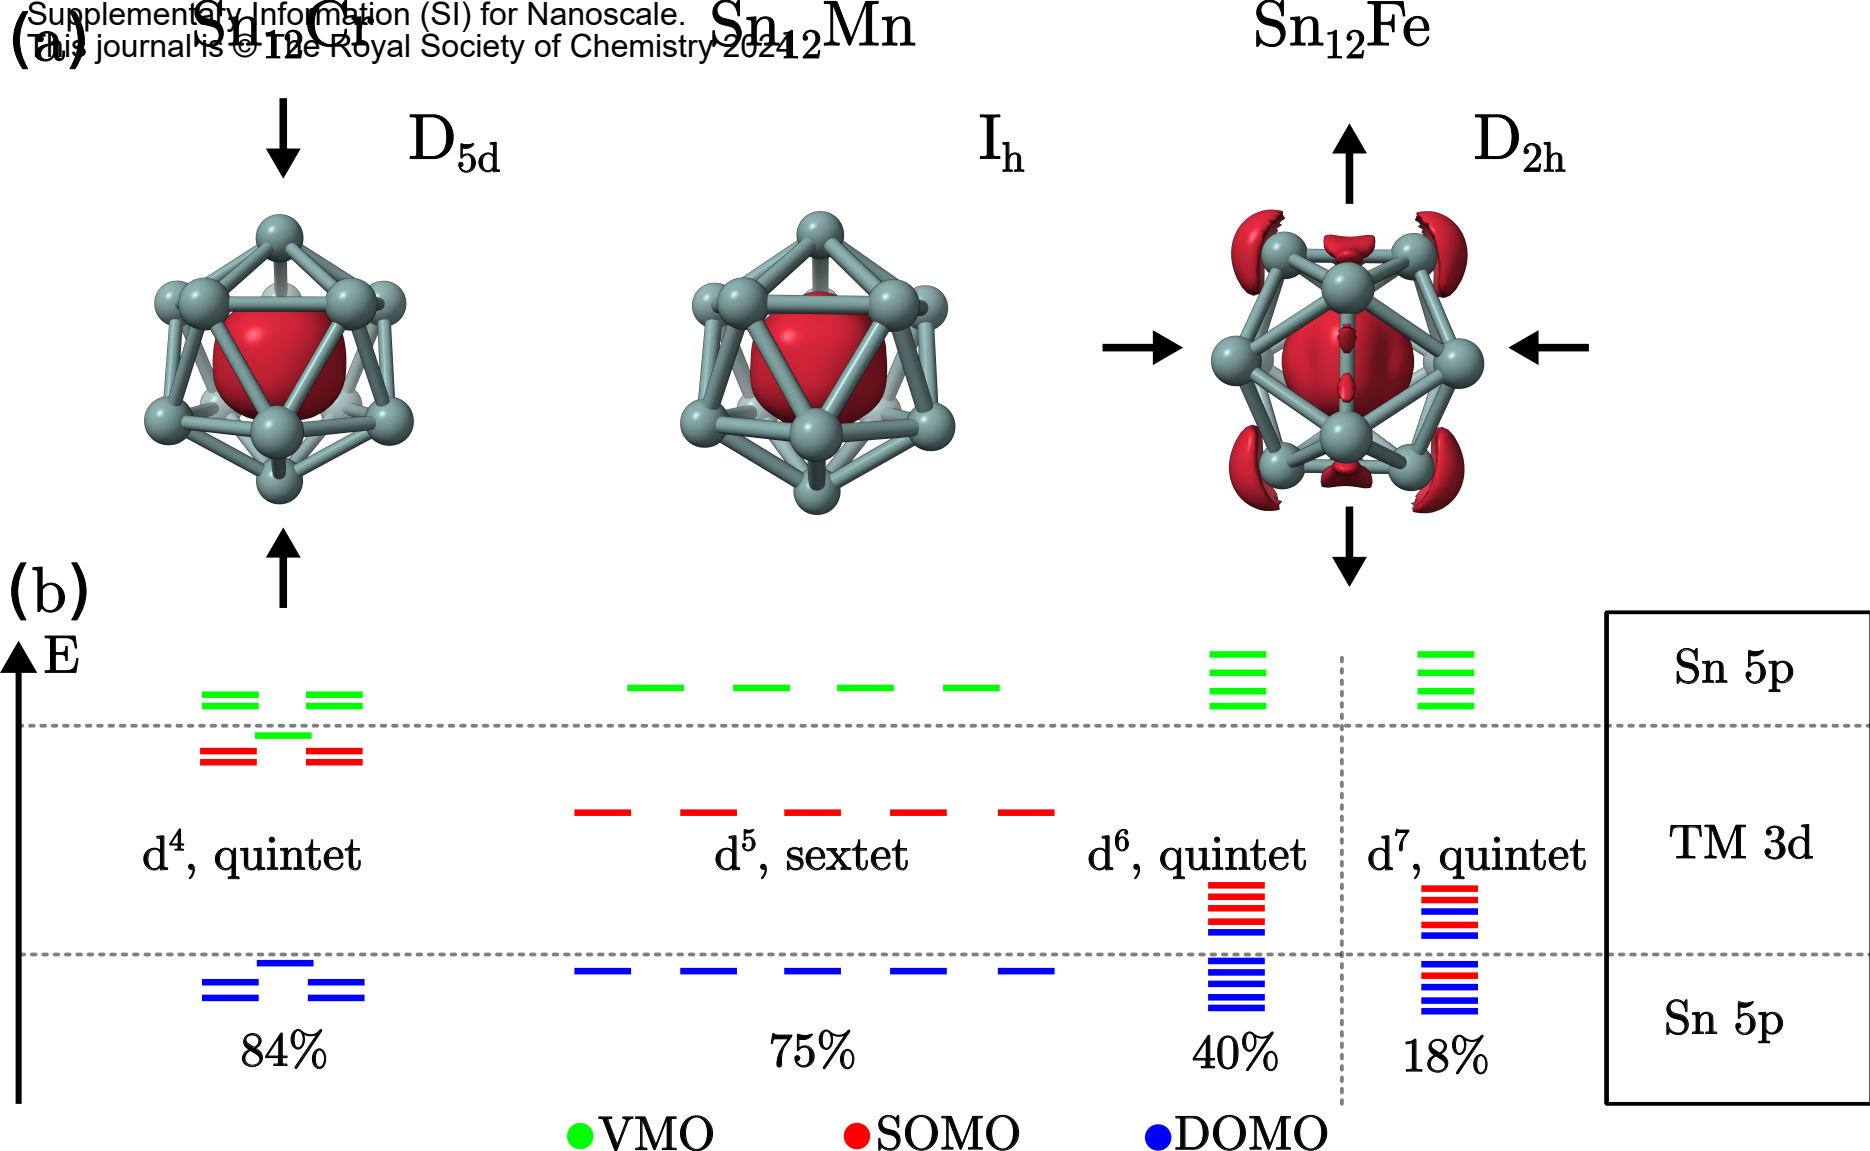

Supplement: d4nr03920c3.pdf [file d4nr03920c3.pdf]

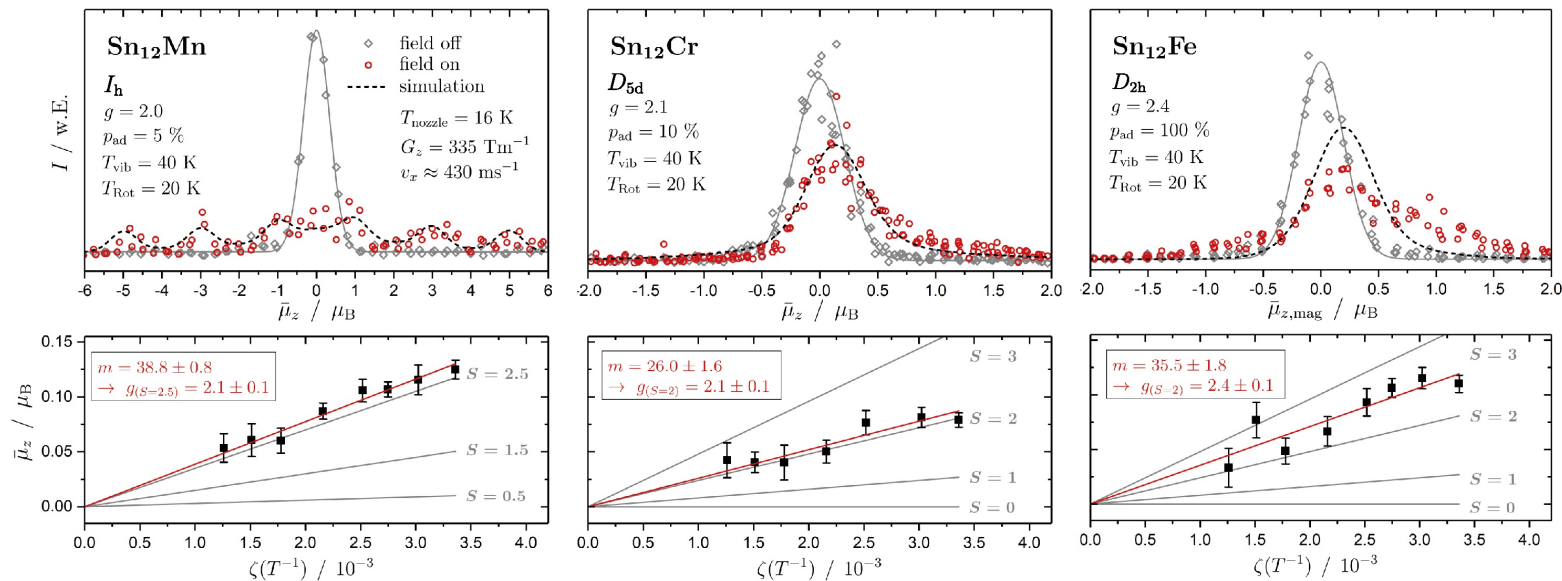

Supplement: d4nr03920c5.pdf [file d4nr03920c5.pdf]

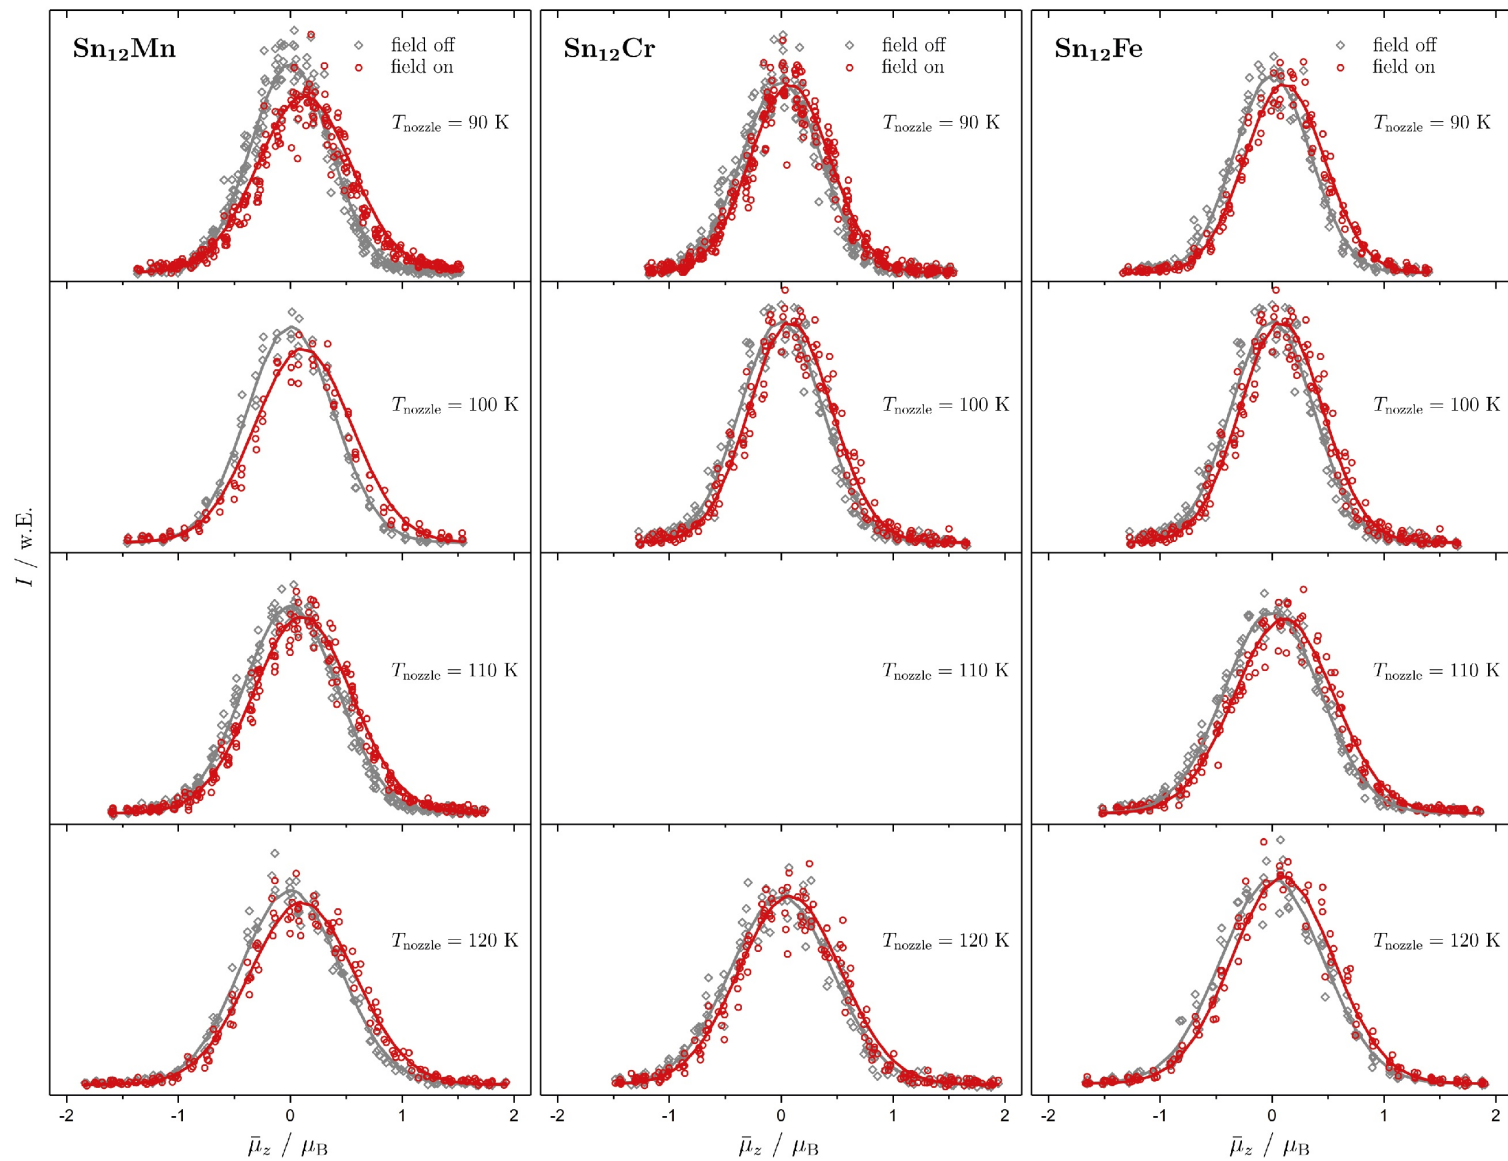

Supplement: d4nr03920c6.pdf [file d4nr03920c6.pdf]

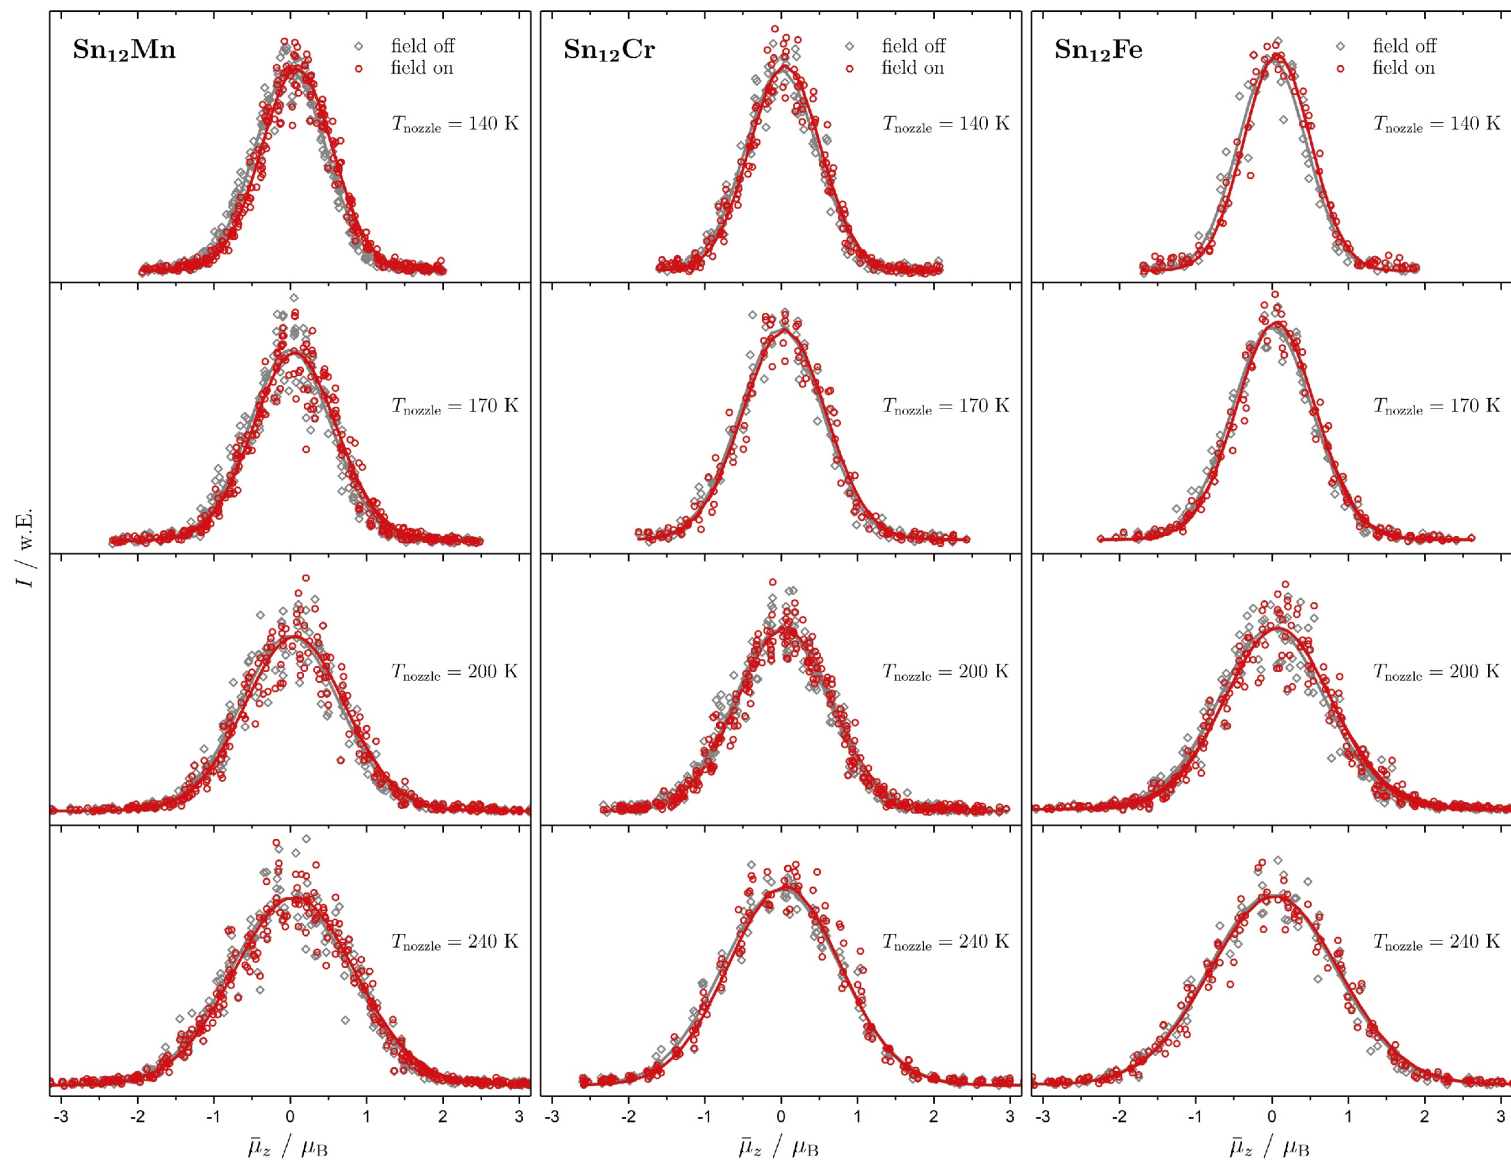

Supplement: d4nr03920c7.pdf [file d4nr03920c7.pdf]
